# Supplementary material for: Scale‐dependent effects of host patch traits on species composition in a stickleback parasite metacommunity
Source: PubMed Central journal article supplement (PMC7757261; doi:10.1002/ecy.3181), 2020-10-01
Supplement: ECY-101-e03181-s001.pdf [file ECY-101-e03181-s001.pdf]

**Supporting Information.** Bolnick, D.I., E.J. Resetarits, K. Ballare, Y.E. Stuart, and W.E. Stutz. 2020. Scale-dependent effects of host patch traits on species composition in a stickleback parasite metacommunity. *Ecology*.

## Appendix S1

**Figure S1.** A) Vancouver Island, with a black dot indicating the location of the inset map (B), where lake, stream, and marine sample sites are indicated in blue, green, and black points.

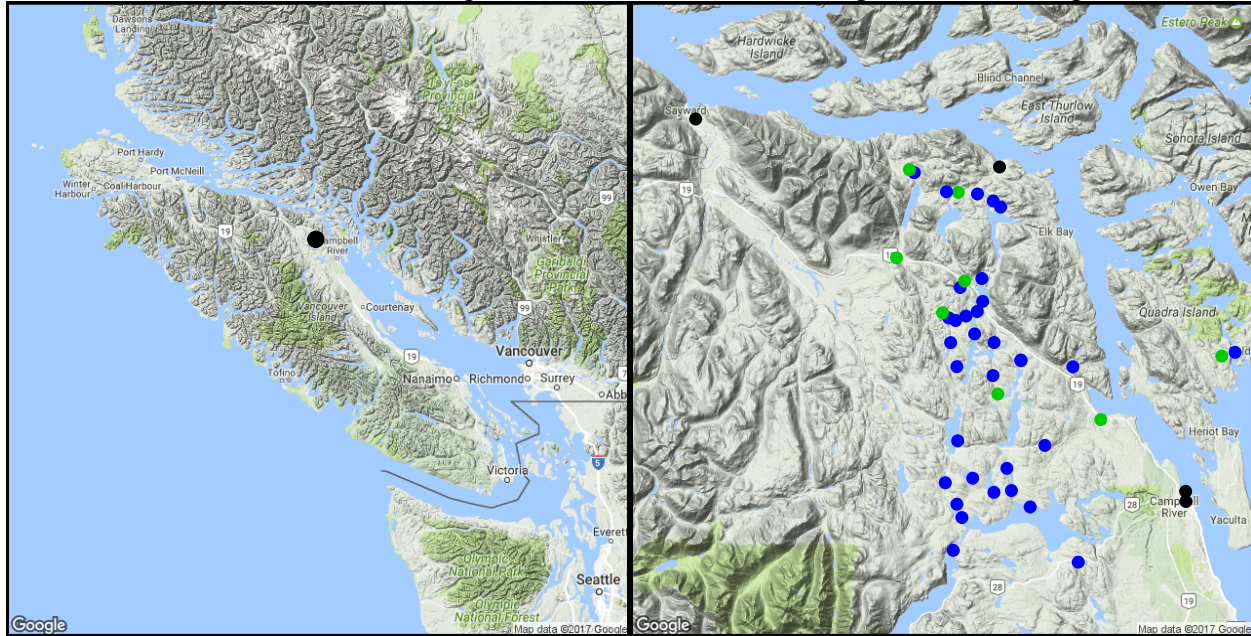

**Figure S2.** A) The distribution of within-lake between-parasite Spearman rank correlations, for all comparisons within all lakes. Note the two modes, positive and negative. B) The distribution of lake-level average correlation coefficients, taking the absolute value before averaging to focus on correlation strength.

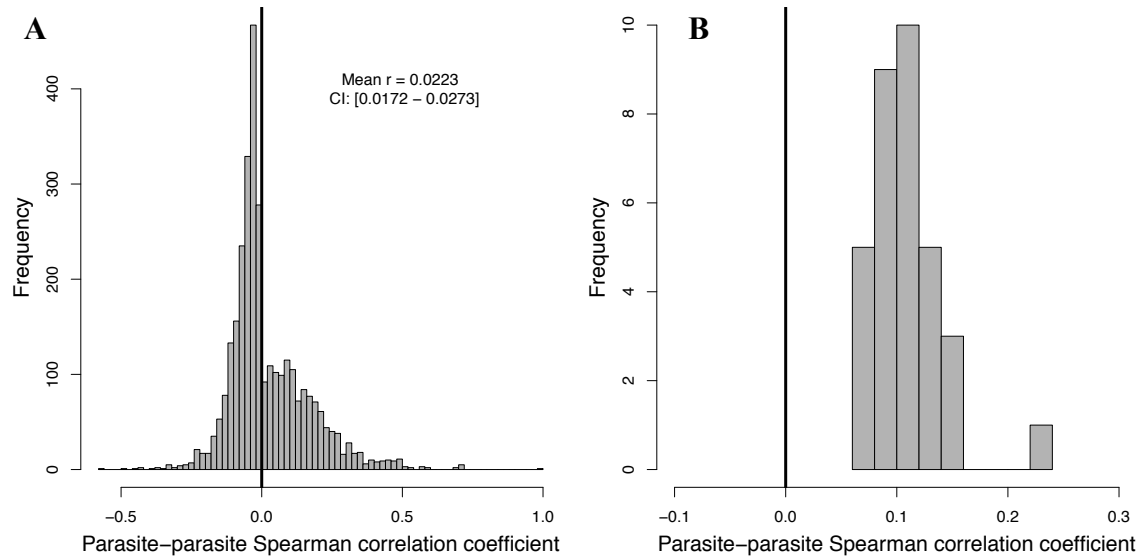

**Figure S3.** Co-occurrence matrix of parasites among individual stickleback in Roberts lake (N = 250 fish). Numbers represent the number of hosts carrying a given parasite.

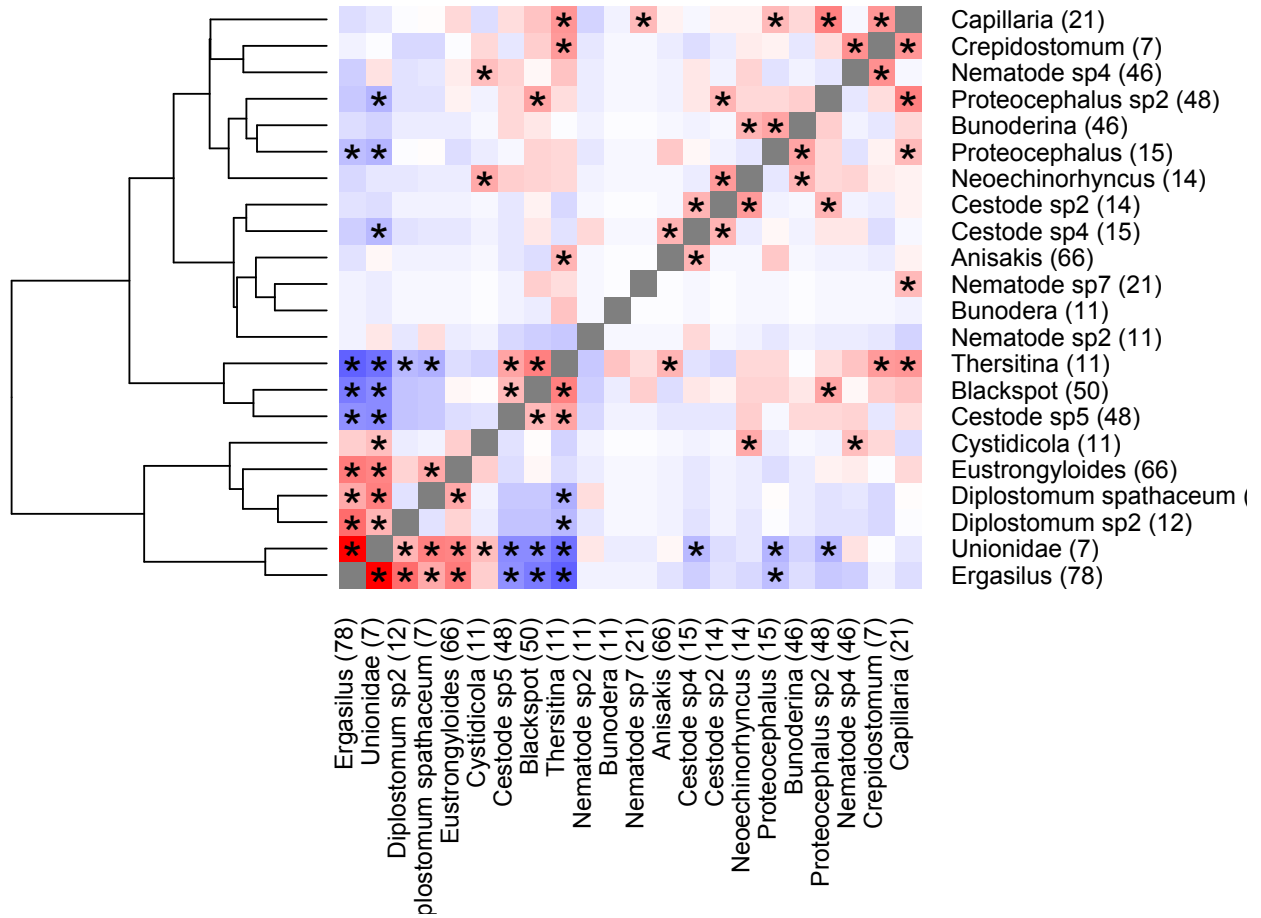

**Figure S4.** Parasite-parasite correlations are inconsistent among host populations. Each column is a host population, with rows representing parasite-parasite comparisons. The farthest-left column represents the among-population correlation matrix (Fig. 5), for comparison. Red and blue denote positive and negative correlations, respectively. White indicates pairwise comparisons for which one or both parasites are absent in a given lake. Asterisks indicate significant comparisons within each population after within-population FDR correction.

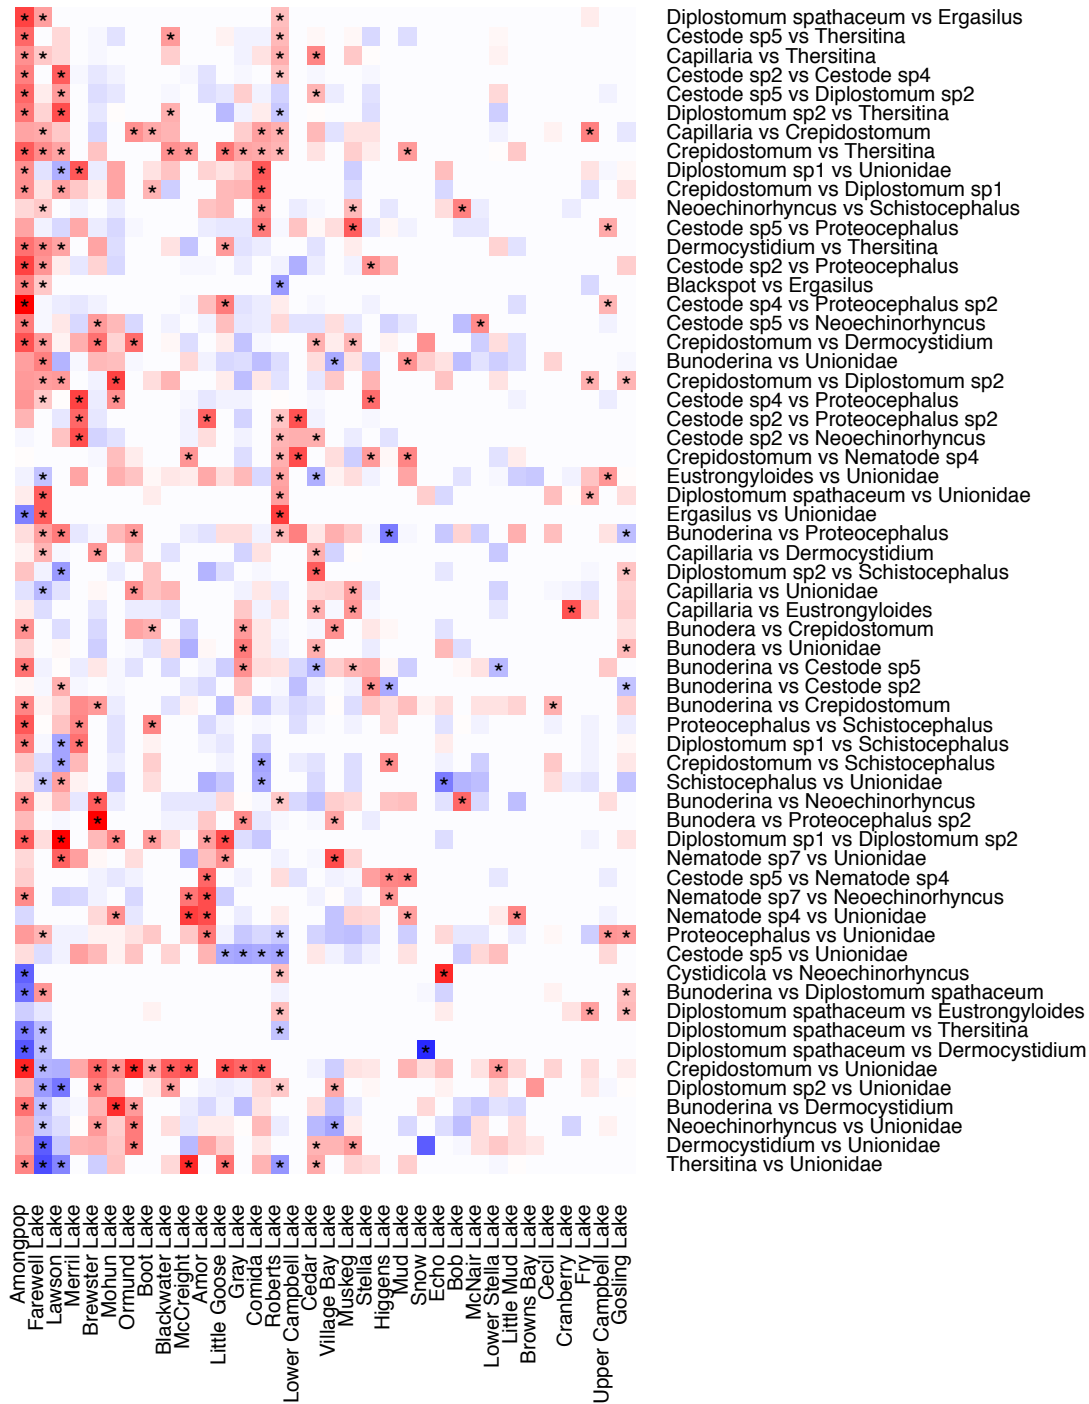

**Figure S5.** We re-evaluated parasite-parasite co-occurrence patterns while controlling for fish mass. To do so, for every pair of parasite taxa  $i$  and  $j$  we used a negative binomial general linear model to evaluate how parasite  $i$ 's abundance depends on lake (random intercept effect), host mass (fixed effect plus random among-lake slope), and the abundance of parasite  $j$  (fixed effect plus random among-lake slope). The two key goals here are illustrated in the two panels. (A) To confirm that parasite-parasite co-occurrence persists when controlling for their shared dependence on host mass, we highlight significant main effect co-occurrences (red) after strict Bonferroni correction. Black matrix elements are non-significant or fail to pass Bonferroni correction. White elements could not be estimated because there were too few fish or lakes in which both parasites co-occurred so the mixed model failed to converge. The final column indicates (in red) parasites whose infection intensity exhibits a main effect of host log mass. (B) To confirm that parasite-parasite co-occurrences differ among lakes, we highlight significant lake\*parasite  $j$  interactions (random slope effects) with red matrix elements, after strict Bonferroni correction. As in (A), black elements are non-significant or fail multiple test correction, and white elements could not be estimated. The last column indicates (in red) the parasites whose infection intensity exhibits a significant lake by log host mass interaction (random slope effect).

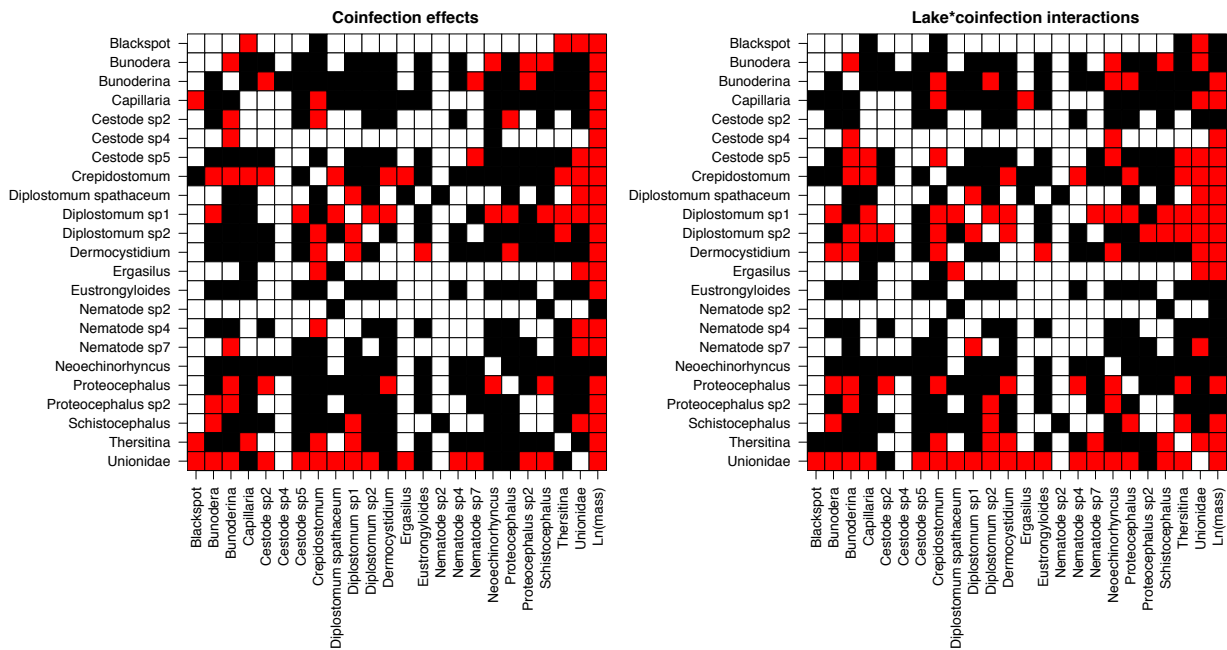

**Figure S6.** An example of parasite-parasite co-occurrence among lakes. Each point is a population (points scaled by their sample size), and the trendline is a Poisson general linear model curve fit with a one standard error confidence interval.

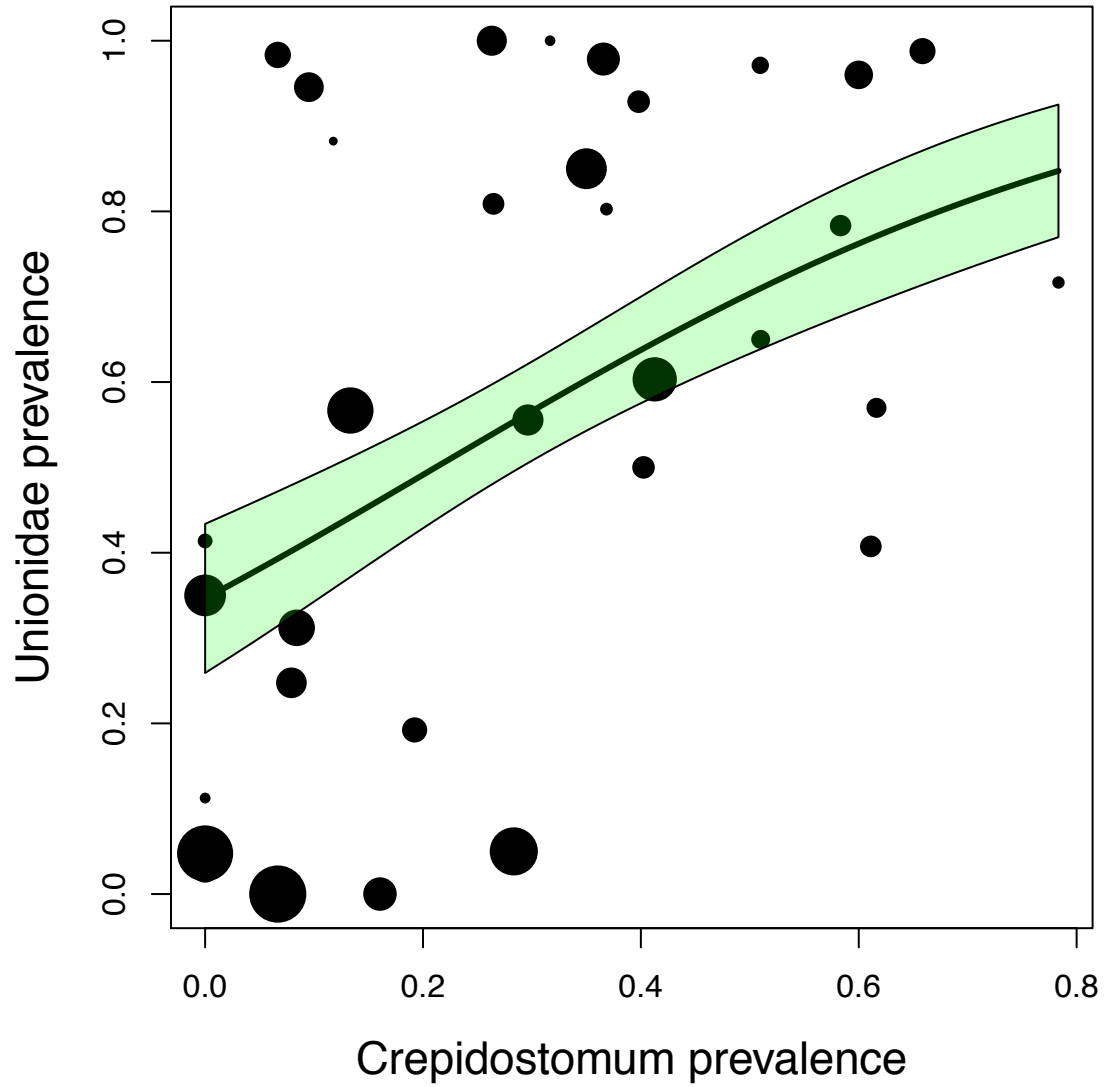

**Figure S7.** Comparisons of host trait effects on parasite infection prevalences at the scale of host individuals (left column, red points) and host populations (right column, blue points). For host individual plots, we plot the general linear model estimate trendline for each lake with sufficient numbers of infected fish (>5); thick solid lines denote significant within-lake trends, dotted thin lines are non-significant. The among-individual effect size slope and standard error come from a binomial general linear model with lake as a random effect. When the main effect of host traits is strong relative to among-lake variance in slopes, we also plot the main effect trend with its confidence interval. For among-lake panels we plot the trendline and 95% confidence interval. We use the same x and y axis scale for each pair of plots in a row, to facilitate visual comparison of their slopes, formalized by comparisons between their estimated slopes.

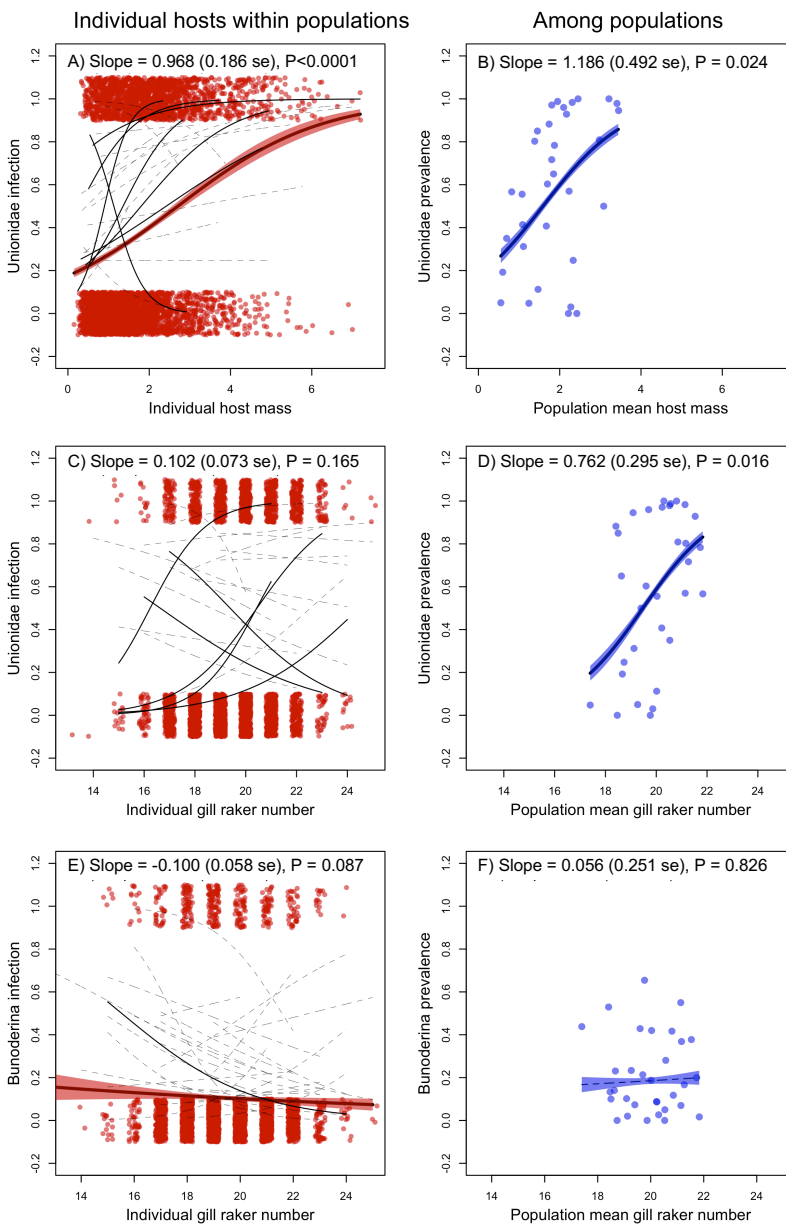

**Figure S8.** Variance partitioning analysis, estimating the extent to which among-lake variation in parasite community composition depends on spatial distance, genetic distance, phenotypic distance, and habitat differences. Numbers in each cell represent the percent variance explained by each factor or interactions among factors (at intersections).

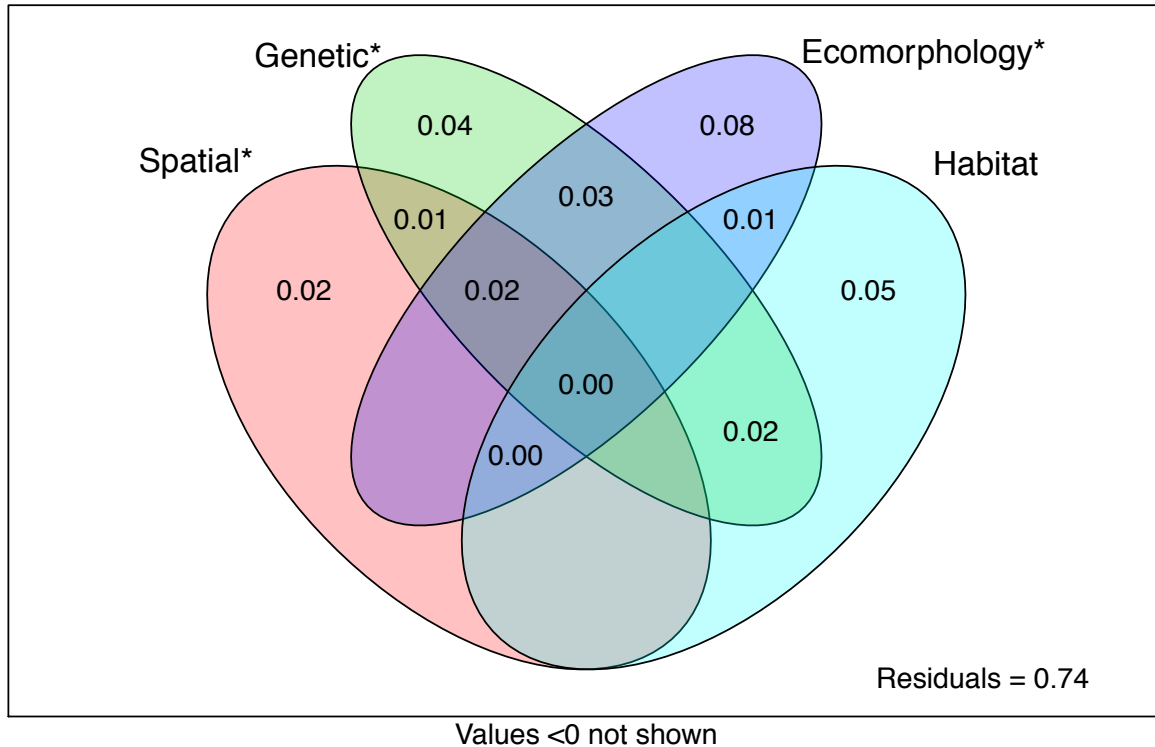

**Figure S9.** Examples of associations between parasite prevalence (% hosts infected) and lake traits, for (A) lake area, (B) lake elevation. GLM trendlines with one standard error confidence estimates are plotted. Lakes are the level of replication in this figure. These associations are summarized in Table S2.

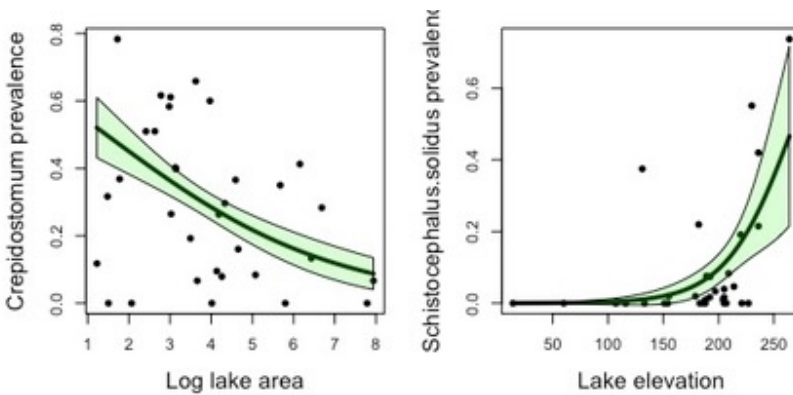



**Figure S10.** Example of strong GWAS results for various parasite taxa, chosen as illustrative examples. For each taxon we plot the position of GWAS associations (blue dots) along chromosomes, showing only the top 20 associations significant after Bonferroni correction. Next to each map, we plot the association between SNP frequency versus the parasite prevalence, for one of the strongest-effect SNPs for that parasite. Points represent populations, with a binomial GLM curve fit. Above each association plot we list the parasite taxon and the linkage group and base position on that chromosome.

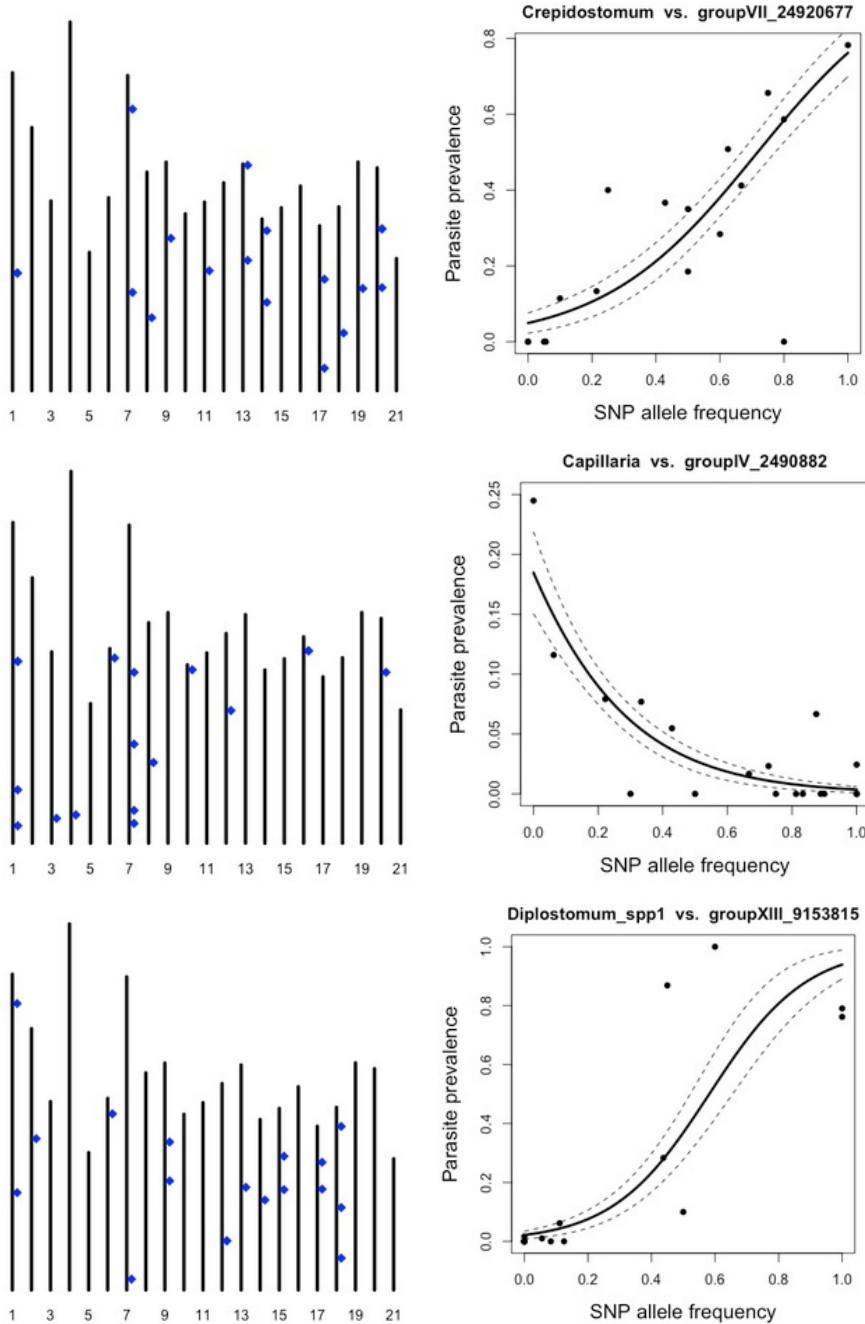

Figure S10 (continued)

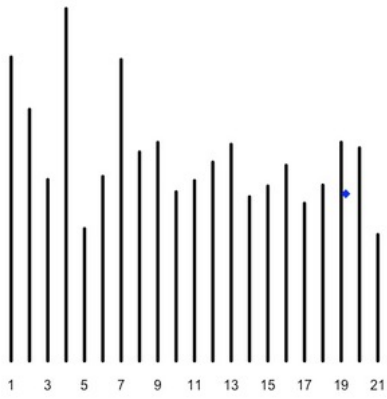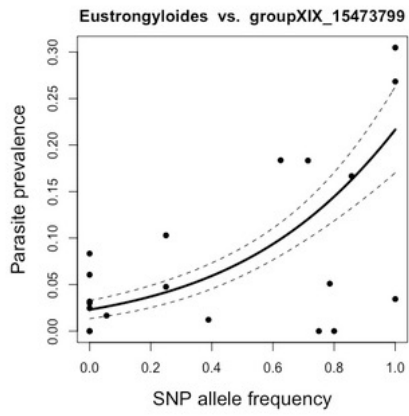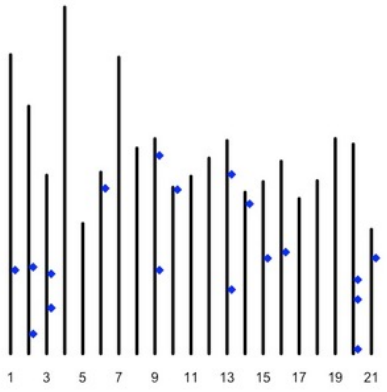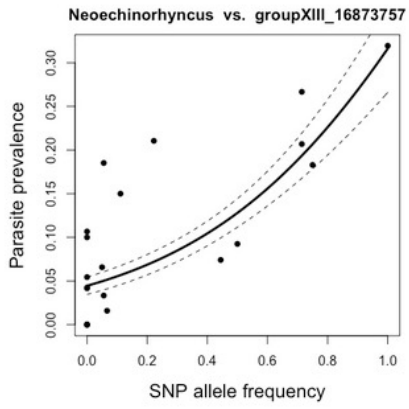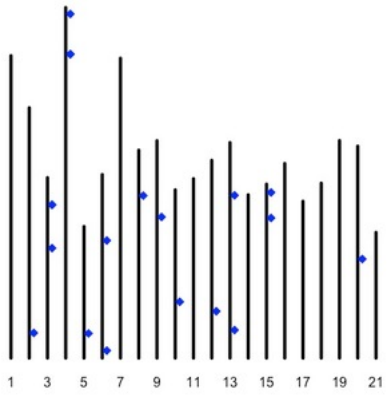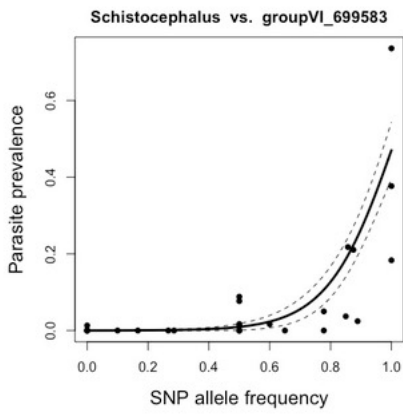

Figure S10 (continued)

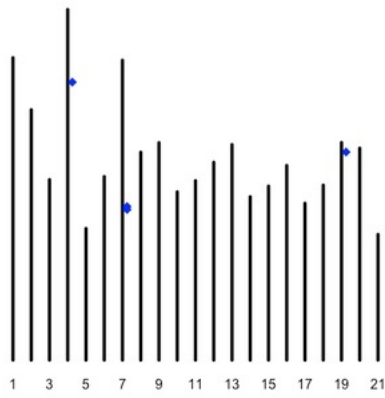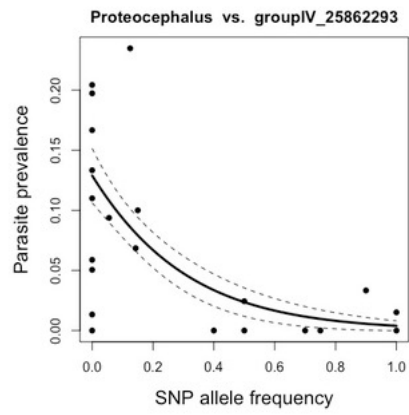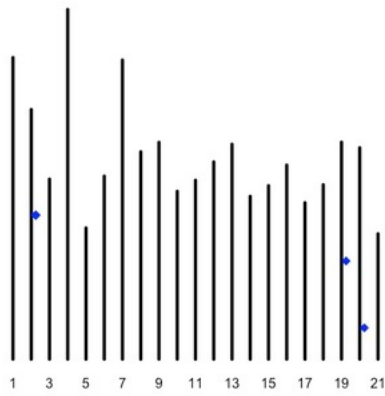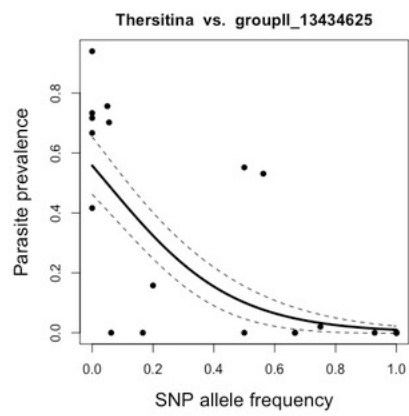

**Table S1** Summary of sampled populations, locations, sample sizes, and mean parasite taxon richness.

| Site name            | Longitude | Latitude | Total | Morphology | Diet | ddRAD | Habitat | Watershed        |
|----------------------|-----------|----------|-------|------------|------|-------|---------|------------------|
| Adam and Eve Estuary | -131.9426 | 50.4012  | 99    | 99         | 0    | 10    | Estuary | Adam River       |
| Amor Bridge          | -125.6639 | 50.2543  | 60    | 30         | 23   | 10    | Stream  | Amor River       |
| Amor Lake            | -125.5791 | 50.1581  | 60    | 30         | 30   | 10    | Lake    | Amor River       |
| Blackwater Lake      | -125.5878 | 50.1794  | 82    | 30         | 25   | 16    | Lake    | Amor River       |
| Bob Lake             | -125.5281 | 50.3045  | 80    | 61         | 61   | 10    | Lake    | Pye River        |
| Boot Lake            | -125.5270 | 50.0467  | 93    | 93         | 0    | 0     | Lake    | Campbell River   |
| Brewster Lake        | -125.5779 | 50.0924  | 63    | 30         | 28   | 10    | Lake    | Campbell River   |
| Browns Bay Lake      | -125.4159 | 50.1580  | 29    | 0          | 0    | 10    | Lake    | Browns Bay Creek |
| Campbell River Marsh | -125.2570 | 50.0387  | 105   | 105        | 0    | 0     | Estuary | Campbell River   |
| Campbell River Point | -125.2574 | 50.0476  | 173   | 173        | 0    | 0     | Estuary | Campbell River   |
| Cecil Lake           | -125.5440 | 50.2361  | 100   | 100        | 0    | 10    | Lake    | Amor River       |
| Cedar Lake           | -125.5664 | 50.2029  | 98    | 30         | 29   | 10    | Lake    | Amor River       |
| Comida Lake          | -125.5283 | 50.1502  | 86    | 86         | 0    | 0     | Lake    | Mohun River      |
| Comida Stream        | -125.5215 | 50.1339  | 192   | 192        | 0    | 0     | Stream  | Mohun River      |
| Cranberry Lake       | -125.4553 | 50.0883  | 66    | 66         | 0    | 10    | Lake    | Mohun River      |
| Echo Lake            | -125.4084 | 49.9848  | 68    | 68         | 0    | 10    | Lake    | Quinsam River    |
| Farewell Lake        | -125.5905 | 50.2013  | 216   | 216        | 0    | 0     | Lake    | Amor River       |
| Farewell Stream      | -125.5992 | 50.2058  | 260   | 260        | 0    | 0     | Stream  | Amor River       |
| Fry Lake             | -125.5720 | 50.0244  | 101   | 101        | 0    | 11    | Lake    | Campbell River   |

|                     |           |         |     |     |    |    |         |                |
|---------------------|-----------|---------|-----|-----|----|----|---------|----------------|
| Gosling Lake        | -125.5023 | 50.0483 | 147 | 146 | 0  | 0  | Lake    | Campbell River |
| Gray Lake           | -125.5953 | 50.0553 | 75  | 30  | 27 | 9  | Lake    | Campbell River |
| Higgins Lake        | -125.5088 | 50.0680 | 81  | 30  | 29 | 10 | Lake    | Campbell River |
| Lawson Lake         | -125.5790 | 50.0362 | 82  | 30  | 27 | 10 | Lake    | Campbell River |
| Little Goose Lake   | -125.4890 | 50.1634 | 76  | 31  | 28 | 10 | Lake    | Mohun River    |
| Little Mud Lake     | -125.5505 | 50.2069 | 60  | 30  | 29 | 10 | Lake    | Amor River     |
| Lower Campbell Lake | -125.4760 | 50.0338 | 30  | 30  | 30 | 10 | Lake    | Campbell River |
| Lower Stella Lake   | -125.5501 | 50.3107 | 104 | 30  | 30 | 10 | Lake    | Pye River      |
| McCreight Lake      | -125.6390 | 50.3295 | 60  | 30  | 28 | 10 | Lake    | Amor River     |
| McCreight Stream    | -125.6457 | 50.3321 | 60  | 30  | 29 | 10 | Stream  | Amor River     |
| McNair Lake         | -125.5744 | 50.2281 | 60  | 30  | 28 | 10 | Lake    | Amor River     |
| Merril Lake         | -125.5568 | 50.0593 | 38  | 30  | 28 | 10 | Lake    | Campbell River |
| Mohun Creek         | -125.3767 | 50.1113 | 27  | 27  | 21 | 10 | Stream  | Mohun River    |
| Mohun Lake          | -125.4890 | 50.1640 | 60  | 30  | 28 | 10 | Lake    | Mohun River    |
| Mud Lake            | -125.5541 | 50.1871 | 60  | 30  | 28 | 10 | Lake    | Amor River     |
| Muskeg Lake         | -125.5808 | 50.1989 | 104 | 30  | 28 | 10 | Lake    | Amor River     |
| Ormud Lake          | -125.5267 | 50.1795 | 60  | 30  | 28 | 10 | Lake    | Amor River     |
| Pye Creek           | -125.5772 | 50.3122 | 60  | 29  | 27 | 0  | Stream  | Pye River      |
| Pye Outlet          | -125.5191 | 50.3345 | 73  | 73  | 0  | 10 | Estuary | Pye River      |
| Roberts Lake        | -125.5428 | 50.2158 | 250 | 250 | 0  | 0  | Lake    | Amor River     |
| Roberts Stream      | -125.5681 | 50.2339 | 354 | 345 | 0  | 0  | Stream  | Amor River     |

|                     |           |         |     |     |    |    |         |                |
|---------------------|-----------|---------|-----|-----|----|----|---------|----------------|
| Sayward Estuary     | -125.9464 | 50.3769 | 100 | 100 | 0  | 10 | Estuary | Salmon River   |
| Snow Lake           | -125.5937 | 50.3127 | 17  | 17  | 3  | 9  | Lake    | Pye River      |
| Stella Lake         | -125.5175 | 50.2992 | 60  | 30  | 30 | 11 | Lake    | Pye River      |
| Upper Campbell Lake | -125.5841 | 49.9953 | 105 | 30  | 29 | 10 | Lake    | Campbell River |
| Village Bay Lake    | -125.1878 | 50.1708 | 81  | 60  | 59 | 0  | Lake    | Village Bay    |
| Village Bay Stream  | -125.2064 | 50.1675 | 60  | 30  | 29 | 0  | Stream  | Village Bay    |

---

**Table S2.** General linear model results from individual-host scale regressions of parasite intensity on individual host traits. We provide slope estimates and standard errors and P-values for the main effects listed, and a P-value for the random slope effect of population. Positive and negative effects are shaded red and blue, respectively, for all significant ( $P < 0.05$ , also in bold font) and marginally significant ( $P < 0.1$ , not bold font) associations. Significant random slope effects of lake are shaded grey.

| Parasite taxon    |                 | Acanthocephalus | Blackspot    | Bunodera | Bunoderina    | Capillaria   | Crepidostomum | Cystidicola | Diplostomum spathaceum | Diplostomum spp | Dermocystidium | Ergasilus     | Eustrongyloides | Neoechinorhynchus | Neoechinocephalus | Proteocephalus | Schistocephalus | Thersitina   |
|-------------------|-----------------|-----------------|--------------|----------|---------------|--------------|---------------|-------------|------------------------|-----------------|----------------|---------------|-----------------|-------------------|-------------------|----------------|-----------------|--------------|
| Sex               | Slope           | -0.235          | -0.277       | -0.257   | <b>-0.385</b> | -0.109       | <b>-0.478</b> | 0.206       | -4.424                 | -0.002          | -0.011         | -0.005        | 0.209           | 0.159             | -0.695            | -0.093         | <b>0.630</b>    | <b>0.587</b> |
|                   | Std Error       | 0.657           | 0.291        | 0.544    | <b>0.193</b>  | 0.257        | <b>0.152</b>  | 0.368       | 6.110                  | 0.273           | 0.279          | 0.529         | 0.323           | 0.295             | 0.664             | 0.297          | <b>0.237</b>    | <b>0.241</b> |
|                   | P               | 0.720           | 0.342        | 0.636    | <b>0.046</b>  | 0.670        | <b>0.002</b>  | 0.575       | 0.469                  | 0.995           | 0.968          | 0.992         | 0.518           | 0.592             | 0.296             | 0.754          | <b>0.008</b>    | <b>0.015</b> |
|                   | Random effect P | 1.000           | 1.000        | 0.087    | 1.000         | 0.230        | 0.991         | 1.000       | <b>0.034</b>           | 1.000           | 0.193          | 0.052         | 0.274           | 0.256             | 0.519             | 0.234          | 0.957           | 0.164        |
| Mass              | Slope           | 0.965           | 0.323        | 0.393    | 0.090         | <b>0.745</b> | <b>0.984</b>  | 0.721       | 1.743                  | <b>1.025</b>    | <b>0.656</b>   | 0.406         | <b>1.036</b>    | <b>1.072</b>      | <b>-0.681</b>     | <b>0.546</b>   | <b>0.583</b>    | <b>1.000</b> |
|                   | Std Error       | 0.586           | 0.304        | 0.332    | 0.198         | <b>0.217</b> | <b>0.165</b>  | 0.522       | 6.668                  | <b>0.301</b>    | <b>0.222</b>   | 0.296         | <b>0.276</b>    | <b>0.254</b>      | <b>0.303</b>      | <b>0.206</b>   | <b>0.212</b>    | <b>0.193</b> |
|                   | P               | 0.100           | 0.288        | 0.236    | 0.650         | <b>0.001</b> | <b>0.000</b>  | 0.167       | 0.794                  | <b>0.001</b>    | <b>0.003</b>   | 0.169         | <b>0.000</b>    | <b>0.000</b>      | <b>0.024</b>      | <b>0.008</b>   | <b>0.006</b>    | <b>0.000</b> |
|                   | Random effect P | 1.000           | 0.958        | 0.186    | 0.992         | <b>0.487</b> | <b>1.000</b>  | 0.998       | 1.000                  | 1.000           | 0.428          | <b>0.114</b>  | 0.550           | <b>0.524</b>      | 0.812             | 0.493          | <b>0.998</b>    | 0.335        |
| Gape              | Slope           | <b>5.010</b>    | 1.744        | 0.555    | <b>-1.532</b> | <b>1.944</b> | <b>2.275</b>  | -1.744      | -7.841                 | -0.863          | 0.967          | <b>-2.661</b> | -0.460          | <b>-2.465</b>     | <b>-2.427</b>     | -0.161         | <b>-2.482</b>   | 0.792        |
|                   | Std Error       | <b>2.617</b>    | 1.268        | 1.333    | <b>0.879</b>  | <b>0.845</b> | <b>0.679</b>  | 1.482       | 13.784                 | 1.220           | 0.962          | <b>1.256</b>  | 1.068           | <b>1.159</b>      | 1.457             | 0.888          | <b>0.964</b>    | 0.786        |
|                   | P               | <b>0.056</b>    | 0.169        | 0.677    | <b>0.081</b>  | <b>0.021</b> | <b>0.001</b>  | 0.239       | 0.569                  | 0.479           | 0.315          | <b>0.034</b>  | 0.667           | <b>0.033</b>      | 0.096             | 0.856          | <b>0.010</b>    | 0.313        |
|                   | Random effect P | 1.000           | 1.000        | 0.227    | 1.000         | 0.487        | 1.000         | 1.000       | 1.000                  | 1.000           | 0.428          | 0.151         | 0.550           | 0.524             | 0.812             | 0.493          | 0.998           | 0.380        |
| Gill raker length | Slope           | -1.427          | <b>1.377</b> | 1.935    | <b>1.582</b>  | 0.140        | -0.147        | -0.880      | 2.273                  | -1.104          | 0.253          | <b>-1.903</b> | <b>-1.199</b>   | 0.439             | -0.645            | <b>1.146</b>   | <b>1.396</b>    | -0.089       |
|                   | Std Error       | 1.367           | <b>0.588</b> | 1.040    | <b>0.534</b>  | 0.429        | 0.365         | 1.163       | 10.736                 | 0.720           | 0.524          | <b>0.621</b>  | <b>0.587</b>    | 0.563             | 0.950             | <b>0.504</b>   | <b>0.638</b>    | 0.377        |
|                   | P               | 0.296           | <b>0.019</b> | 0.063    | <b>0.003</b>  | 0.745        | 0.688         | 0.449       | 0.832                  | 0.125           | 0.630          | <b>0.002</b>  | <b>0.041</b>    | 0.435             | 0.497             | <b>0.023</b>   | <b>0.029</b>    | 0.813        |
|                   | Random effect P | 1.000           | 1.000        | 0.234    | 1.000         | 0.487        | 1.000         | 1.000       | 1.000                  | 1.000           | 0.428          | 0.151         | 0.550           | 0.524             | 0.812             | 0.493          | 0.998           | 0.380        |

|                             |                    |       |       |              |        |              |              |        |        |        |       |               |              |       |              |              |        |       |
|-----------------------------|--------------------|-------|-------|--------------|--------|--------------|--------------|--------|--------|--------|-------|---------------|--------------|-------|--------------|--------------|--------|-------|
| Gill raker<br>number        | Slope              | 0.360 | 0.114 | -0.061       | -0.100 | 0.065        | <b>0.099</b> | -0.038 | -1.267 | 0.004  | 0.025 | <b>-0.453</b> | 0.083        | 0.026 | -0.045       | -0.117       | -0.073 | 0.015 |
|                             | Std Error          | 0.233 | 0.109 | 0.118        | 0.058  | 0.079        | <b>0.051</b> | 0.152  | 2.016  | 0.102  | 0.064 | <b>0.104</b>  | 0.080        | 0.072 | 0.131        | 0.078        | 0.073  | 0.057 |
|                             | P                  | 0.122 | 0.298 | 0.605        | 0.087  | 0.410        | <b>0.050</b> | 0.802  | 0.530  | 0.972  | 0.694 | <b>0.000</b>  | 0.297        | 0.719 | 0.732        | 0.137        | 0.320  | 0.790 |
|                             | Random<br>effect P | 1.000 | 0.995 | <b>0.049</b> | 0.999  | 0.479        | 1.000        | 1.000  | 0.000  | 1.000  | 0.428 | 0.151         | 0.550        | 0.485 | 0.812        | 0.097        | 0.998  | 0.380 |
| Diet<br>NMDS1               | Slope              |       |       | 0.963        | 0.268  | -0.477       | 0.061        |        | 0.445  | -0.414 |       | -0.314        | <b>0.543</b> |       | 0.296        | <b>1.045</b> | -0.158 |       |
|                             | Std Error          |       |       | 0.774        | 0.213  | 2.648        | 0.224        |        | 0.537  | 0.258  |       | 0.376         | <b>0.328</b> |       | 1.801        | <b>0.422</b> | 0.285  |       |
|                             | P                  |       |       | 0.214        | 0.210  | 0.857        | 0.784        |        | 0.407  | 0.109  |       | 0.404         | <b>0.098</b> |       | 0.869        | <b>0.013</b> | 0.578  |       |
|                             | Random<br>effect P |       |       | 0.861        | 0.994  | <b>0.000</b> | 1.000        |        | 0.950  | 1.000  |       | 1.000         | 0.320        |       | <b>0.000</b> | 1.000        | 0.982  |       |
| Diet<br>NMDS2               | Slope              |       |       | -0.098       | -0.319 | -0.179       | 0.099        |        | -0.835 | -0.287 |       | <b>-0.680</b> | -0.252       |       | -0.974       | -0.088       | 0.003  |       |
|                             | Std Error          |       |       | 0.558        | 0.204  | 2.390        | 0.211        |        | 0.552  | 0.247  |       | 0.375         | 0.307        |       | 1.737        | 0.439        | 0.268  |       |
|                             | P                  |       |       | 0.861        | 0.117  | 0.940        | 0.638        |        | 0.131  | 0.246  |       | <b>0.069</b>  | 0.413        |       | 0.575        | 0.841        | 0.990  |       |
| Number of infected<br>lakes |                    | 2     | 3     | 8            | 25     | 11           | 25           | 2      | 9      | 10     | 16    | 3             | 12           | 17    | 3            | 17           | 10     | 15    |



**Table S3.** General linear model results from host-population scale regressions of parasite prevalence on lake and population traits (e.g., trait means). We provide slope estimates and standard errors and P-values for the main effects listed. Positive and negative effects are shaded red and blue, respectively, for all significant ( $P < 0.05$ , also in bold font) and marginally significant ( $P < 0.1$ , not bold font) associations. Parasite taxa (columns) are ordered by average abundance across the entire metacommunity from most abundant (left) to least (right),

| Parasite taxon      |           | Unionidae     | Crepidostomum | Bunoderina | Thersitina | Dermocystidium | Diplostomum.sp1 | Ergasilus     | Neoechinorhynchus | Eustrongyloides | Schistocephalus.solidus | Diplostomum.spathaceum | Proteocephalus | Capillaria | Bunodera     | Blackspot | Cystidicola  | Anisakis | Neoechinocephalus | Glugea | Acanthocephalus |
|---------------------|-----------|---------------|---------------|------------|------------|----------------|-----------------|---------------|-------------------|-----------------|-------------------------|------------------------|----------------|------------|--------------|-----------|--------------|----------|-------------------|--------|-----------------|
| Elevation           | Slope     | 0.002         | -0.005        | 0.000      | -0.008     | <b>-0.015</b>  | 0.019           | <b>-0.026</b> | 0.004             | -0.006          | <b>0.036</b>            | <b>0.023</b>           | 0.009          | 0.003      | -0.007       | -0.010    | <b>0.042</b> | 0.012    | 0.018             | 0.005  | 0.003           |
|                     | Std Error | 0.007         | 0.005         | 0.006      | 0.008      | 0.009          | 0.015           | <b>0.011</b>  | 0.006             | 0.006           | <b>0.017</b>            | <b>0.012</b>           | 0.005          | 0.009      | 0.008        | 0.010     | <b>0.018</b> | 0.010    | 0.013             | 0.009  | 0.014           |
|                     | P         | 0.735         | 0.394         | 0.946      | 0.290      | <b>0.099</b>   | 0.235           | <b>0.021</b>  | 0.475             | 0.346           | <b>0.046</b>            | <b>0.069</b>           | 0.119          | 0.749      | 0.425        | 0.308     | <b>0.024</b> | 0.222    | 0.172             | 0.570  | 0.841           |
| Log lake area       | Slope     | <b>-0.404</b> | <b>-0.450</b> | 0.021      | -0.297     | <b>-0.577</b>  | -0.222          | -0.096        | -0.079            | 0.079           | -0.159                  | -0.038                 | 0.176          | -0.047     | 0.011        | 0.210     | 0.103        | 0.066    | -0.033            | 0.310  | 0.199           |
|                     | Std Error | <b>0.174</b>  | <b>0.142</b>  | 0.141      | 0.207      | <b>0.260</b>   | 0.284           | 0.237         | 0.134             | 0.137           | 0.280                   | 0.224                  | 0.103          | 0.184      | 0.213        | 0.235     | 0.261        | 0.167    | 0.230             | 0.202  | 0.239           |
|                     | P         | <b>0.027</b>  | <b>0.004</b>  | 0.880      | 0.162      | <b>0.034</b>   | 0.441           | 0.688         | 0.561             | 0.570           | 0.575                   | 0.865                  | 0.098          | 0.799      | 0.961        | 0.378     | 0.697        | 0.694    | 0.887             | 0.136  | 0.412           |
| Distance from ocean | Slope     | 0.028         | <b>0.050</b>  | 0.002      | 0.032      | <b>0.076</b>   | 0.061           | <b>0.158</b>  | -0.032            | 0.043           | -0.013                  | <b>-0.107</b>          | -0.009         | 0.028      | 0.016        | 0.036     | 0.026        | 0.027    | 0.024             | -0.049 | 0.048           |
|                     | Std Error | 0.034         | <b>0.026</b>  | 0.029      | 0.039      | <b>0.043</b>   | 0.059           | <b>0.054</b>  | 0.027             | 0.030           | 0.058                   | <b>0.050</b>           | 0.022          | 0.038      | 0.044        | 0.052     | 0.070        | 0.038    | 0.051             | 0.046  | 0.058           |
|                     | P         | 0.415         | <b>0.061</b>  | 0.948      | 0.419      | <b>0.089</b>   | 0.309           | <b>0.006</b>  | 0.253             | 0.157           | 0.819                   | <b>0.042</b>           | 0.690          | 0.462      | 0.712        | 0.499     | 0.711        | 0.488    | 0.643             | 0.288  | 0.418           |
| Mean fish mass      | Slope     | <b>1.186</b>  | 0.347         | -0.289     | 0.032      | -0.528         | <b>3.112</b>    | 0.103         | -0.111            | 0.267           | 0.952                   | 0.409                  | <b>0.468</b>   | 0.579      | <b>1.615</b> | -0.400    | <b>3.188</b> | -0.347   | 0.167             | 0.032  | <b>1.481</b>    |
|                     | Std Error | <b>0.492</b>  | 0.371         | 0.462      | 0.539      | 0.831          | <b>1.546</b>    | 0.736         | 0.450             | 0.376           | 0.666                   | 0.726                  | <b>0.260</b>   | 0.521      | <b>0.487</b> | 0.814     | <b>1.157</b> | 0.543    | 0.639             | 0.706  | <b>0.732</b>    |
|                     | P         | <b>0.024</b>  | 0.359         | 0.537      | 0.954      | 0.531          | <b>0.055</b>    | 0.890         | 0.808             | 0.484           | 0.165                   | 0.578                  | <b>0.084</b>   | 0.276      | <b>0.003</b> | 0.627     | <b>0.011</b> | 0.529    | 0.797             | 0.964  | <b>0.050</b>    |

|                         |           |              |        |              |               |        |        |        |        |        |        |               |               |        |              |        |        |              |              |               |       |       |
|-------------------------|-----------|--------------|--------|--------------|---------------|--------|--------|--------|--------|--------|--------|---------------|---------------|--------|--------------|--------|--------|--------------|--------------|---------------|-------|-------|
| Mean gape width         | Slope     | 3.101        | 7.206  | -3.023       | <b>27.165</b> | 2.558  | 24.265 | 10.589 | -1.893 | 5.752  | -3.976 | -             | -5.659        | 4.562  | 2.720        | 4.113  | -0.623 | -6.135       | -            | 6.959         | 3.954 |       |
|                         | Std Error | 5.694        | 4.710  | 5.599        | <b>9.532</b>  | 10.651 | 16.948 | 10.593 | 5.490  | 5.212  | 7.216  | <b>7.983</b>  | 3.238         | 6.611  | 5.636        | 9.854  | 10.343 | 7.017        | 8.238        | 8.977         | 8.467 |       |
|                         | P         | 0.591        | 0.139  | 0.594        | <b>0.009</b>  | 0.812  | 0.165  | 0.327  | 0.733  | 0.280  | 0.587  | <b>0.036</b>  | 0.093         | 0.497  | 0.634        | 0.680  | 0.952  | 0.390        | 0.141        | 0.445         | 0.645 |       |
| Mean gill raker length  | Slope     | -3.542       | -0.149 | 0.581        | -4.226        | -4.242 | 12.292 | -2.343 | 0.823  | -2.765 | 1.277  | 2.548         | <b>-2.715</b> | 0.080  | 1.896        | 3.892  | -0.664 | -            | <b>5.006</b> | <b>-6.502</b> | 5.579 | 1.973 |
|                         | Std Error | 2.249        | 1.663  | 2.113        | 2.849         | 3.610  | 7.456  | 3.925  | 1.970  | 1.906  | 3.056  | 3.149         | <b>1.278</b>  | 2.510  | 2.254        | 4.278  | 4.387  | <b>2.438</b> | <b>3.082</b> | 3.947         | 3.994 |       |
|                         | P         | 0.128        | 0.929  | 0.785        | 0.150         | 0.251  | 0.112  | 0.556  | 0.680  | 0.159  | 0.680  | 0.426         | <b>0.044</b>  | 0.975  | 0.408        | 0.372  | 0.881  | <b>0.049</b> | <b>0.045</b> | 0.170         | 0.626 |       |
| Mean gill raker number  | Slope     | <b>0.762</b> | 0.385  | 0.056        | 0.500         | 0.184  | 0.641  | -0.788 | 0.415  | 0.252  | -0.721 | -0.495        | 0.210         | 0.268  | <b>0.776</b> | -0.136 | 1.060  | -0.372       | -0.477       | 0.401         | 0.117 |       |
|                         | Std Error | <b>0.295</b> | 0.228  | 0.251        | 0.362         | 0.447  | 1.069  | 0.532  | 0.254  | 0.227  | 0.586  | 0.438         | 0.153         | 0.339  | <b>0.317</b> | 0.412  | 0.676  | 0.315        | 0.420        | 0.428         | 0.532 |       |
|                         | P         | <b>0.016</b> | 0.103  | 0.826        | 0.179         | 0.683  | 0.554  | 0.151  | 0.115  | 0.277  | 0.230  | 0.269         | 0.182         | 0.437  | <b>0.022</b> | 0.744  | 0.129  | 0.249        | 0.266        | 0.357         | 0.827 |       |
| Mean diet NMDS1         | Slope     | -0.094       | 2.023  | <b>5.165</b> | -0.046        | 1.220  | -6.352 | -1.048 | 1.003  | 2.996  | -2.982 | <b>73.712</b> | -2.167        | -0.977 | -2.369       | 6.271  | -1.048 | 2.248        | -1.847       | -0.025        | 1.048 |       |
|                         | Std Error | 3.219        | 2.400  | <b>2.137</b> | 3.377         | 3.467  | 4.545  | 2.018  | 1.815  | 2.741  | 4.693  | <b>15.349</b> | 1.454         | 3.634  | 2.667        | 7.479  | 2.018  | 5.261        | 7.741        | 3.349         | 2.018 |       |
|                         | P         | 0.977        | 0.410  | <b>0.026</b> | 0.989         | 0.729  | 0.179  | 0.610  | 0.587  | 0.289  | 0.533  | <b>0.000</b>  | 0.153         | 0.791  | 0.386        | 0.413  | 0.610  | 0.674        | 0.814        | 0.994         | 0.610 |       |
| Watershed random effect | P         | 0.498        | 0.453  | 0.807        | 0.344         | 0.851  | 0.000  | 0.672  | 0.206  | 0.977  | 0.007  | 0.164         | 0.194         | 0.743  | 0.028        | 0.291  | 0.092  | 0.462        | 0.456        | 0.466         | 0.400 |       |
