# Supplementary material for: Scale‐dependent effects of host patch traits on species composition in a stickleback parasite metacommunity
Source: PubMed Central journal article supplement (PMC7757261; doi:10.1002/ecy.3181), 2020-10-01
Supplement: ECY-101-e03181-s005.pdf [file ECY-101-e03181-s005.pdf]

**Bolnick, D.I., E.J. Resetarits, K. Ballare, Y.E. Stuart, and W.E. Stutz. 2020.**  
**Scale-dependent effects of host patch traits on species composition in a**  
**stickleback parasite metacommunity. *Ecology***

---

## **Data S2**

Results of `testcov()` comparisons of parasite-parasite cooccurrence matrices between pairs of lakes (co-occurrence at the individual host scale), and in comparison to the among-lake covariance matrix (second column on the right), and the covariance matrix among all fish (omitting population structure, right-most column). Cells present p-values testing the null hypothesis that a given comparison has the same underlying covariance matrix.

---

## **Authors of the material provided in DataS2.zip**

Daniel I. Bolnick (Author to contact with questions)  
Ecology and Evolutionary Biology & Institute of System Genomics, University of  
Connecticut, Storrs CT 06269, USA  
[Daniel.bolnick@uconn.edu](mailto:Daniel.bolnick@uconn.edu)

Emlyn J. Resetarits  
Center for the Ecology of Infectious Disease, Odum School of Ecology, University of  
Georgia, Athens, GA, USA  
[Emlyn.resetarits@uga.edu](mailto:Emlyn.resetarits@uga.edu)

Kimberly Ballare  
Ecology and Evolutionary Biology, University of California Santa Cruz, Santa Cruz, CA  
95064, USA  
[Kim.ballare@gmail.com](mailto:Kim.ballare@gmail.com)

Yoel E. Stuart  
Department of Biology, Loyola University, Chicago IL, 60660, USA  
[ystuart@luc.edu](mailto:ystuart@luc.edu)

William E. Stutz  
Office of Institutional Research, Western Michigan University, Kalamazoo, MI, USA  
[westutz@utexas.edu](mailto:westutz@utexas.edu)

---

**File list (file found within DataS2.zip)**

testcov\_comparisons.csv

## **Description**

testcov\_comparisons.csv - Results of testcov() comparisons of parasite-parasite cooccurrence matrices between pairs of lakes (co-occurrence at the individual host scale), and in comparison to the among-lake covariance matrix (second column on the right), and the covariance matrix among all fish (omitting population structure, right-most column). Cells present p-values testing the null hypothesis that a given comparison has the same underlying covariance matrix.

---
